# Supplementary material
Source: PubMed Central journal article supplement (PMC5932627)
Supplement: NIHMS961060-supplement-supplement_1.pdf [file NIHMS961060-supplement-supplement_1.pdf]

74. Ortiz, L.A. *et al.* Interleukin 1 receptor antagonist mediates the anti-inflammatory and antifibrotic effect of mesenchymal stem cells during lung injury. *Proc. Natl. Acad. Sci. U.S.A.* **104**(26), 11002-11007 (2007).
75. Cohen, J. Set correlation and contingency—Tables. *Appl. Psychol. Meas.* **12**(4), 425-434 (1988).
76. Wang, X.Y. *et al.* Donor myocardial infarction impairs the therapeutic potential of bone marrow cells by an interleukin-1-mediated inflammatory response. *Sci. Transl. Med.* **3**(100), 100ra90 (2011).
77. Sanz-Nogues, C. & O'Brien, T. MSCs isolated from patients with ischemic vascular disease have normal angiogenic potential. *Mol. Ther.* **22**(11), 1888-1889 (2014).
78. Bocelli-Tyndall, C. *et al.* Bone marrow mesenchymal stromal cells (BM-MSCs) from healthy donors and auto-immune disease patients reduce the proliferation of autologous- and allogeneic-stimulated lymphocytes *in vitro*. *Rheumatology* **46**(3), 403-408 (2007).
79. Bacigalupo, A. *et al.* T-cell suppression mediated by mesenchymal stem cells is deficient in patients with severe aplastic anemia. *Exp. Hematol.* **33**(7), 819-827 (2005).
80. Murphy, J.M. *et al.* Reduced chondrogenic and adipogenic activity of mesenchymal stem cells from patients with advanced osteoarthritis. *Arthritis Rheum.* **46**(3), 704-713 (2002).
81. Del Papa, N. *et al.* Bone marrow endothelial progenitors are defective in systemic sclerosis. *Arthritis Rheum.* **54**(8), 2605-2615 (2006).
82. Kastrinaki, M.C. *et al.* Functional, molecular and proteomic characterisation of bone marrow mesenchymal stem cells in rheumatoid arthritis. *Ann. Rheum. Dis.* **67**(6), 741-749 (2008).
83. Papadaki, H.A. *et al.* Normal bone marrow hematopoietic stem cell reserves and normal stromal cell function support the use of autologous stem cell transplantation in patients with multiple sclerosis. *Bone Marrow Transplant.* **36**(12), 1053-1063.
84. Mallam, E. *et al.* Characterization of *in vitro* expanded bone marrow-derived mesenchymal stem cells from patients with multiple sclerosis. *Mult. Scler. J.* **16**(8), 909-918 (2010).
85. Mazzanti, B. *et al.* Differences in mesenchymal stem cell cytokine profiles between MS patients and healthy donors: Implication for assessment of disease activity and treatment. *J. Neuroimmunol.* **199**(1-2), 142-150 (2008).

## SUPPLEMENTARY INFORMATION

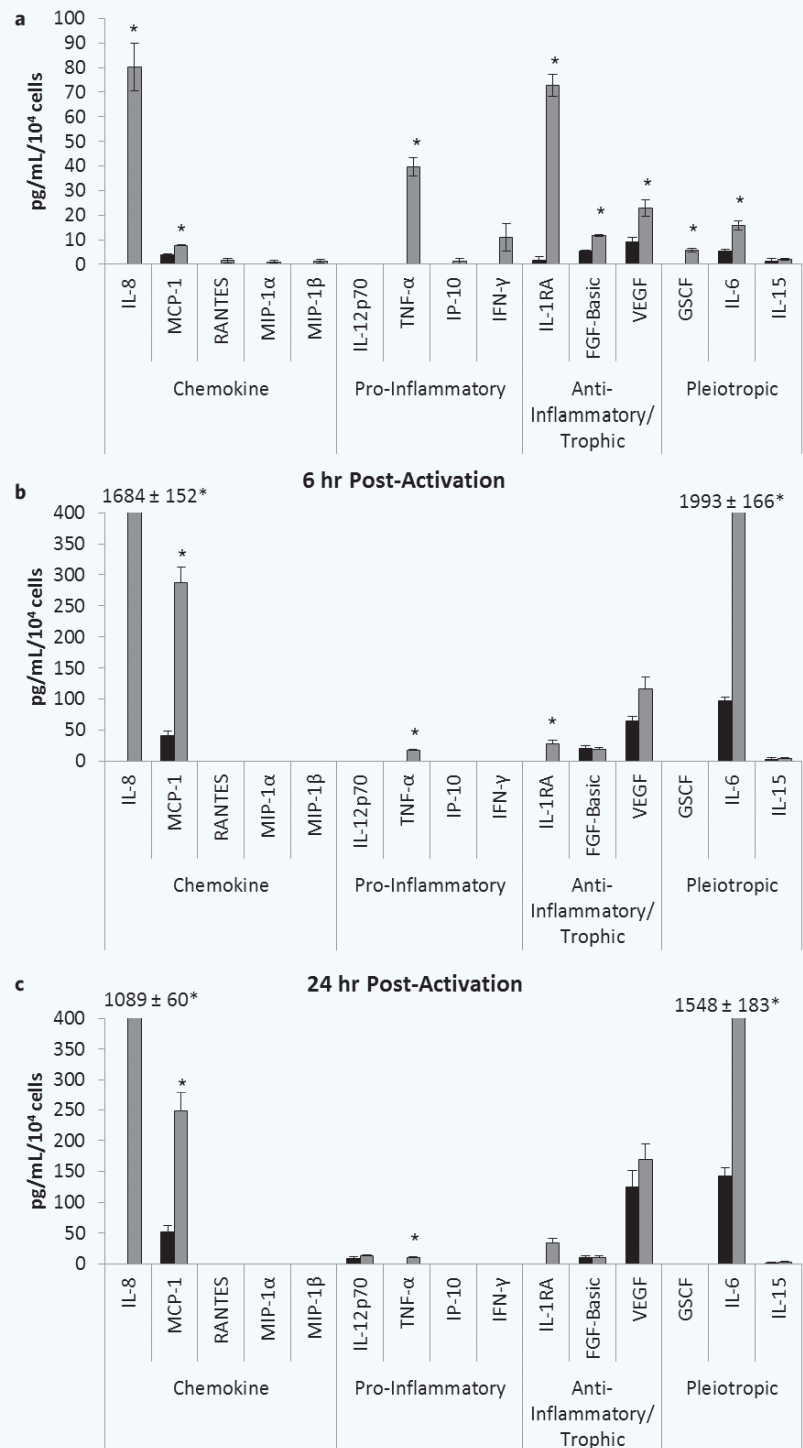

**Supplementary Figure 1** MSC secretome changes at the end of the activation period and over time post-activation. (a) MSCs were cultured without (black bars) or with IL-1 $\beta$  (grey bars) for 1 hour. Out of 27 secreted factors quantified, 15 were detected in supernatants using a bead-based multiplex immunoassay. (b) Pre-activated cell culture supernatants were replaced by fresh medium for (b) 6 or (c) 24 hours. Secreted factors in supernatants were quantified using a bead-based multiplex immunoassay. Data are the mean  $\pm$  SEM for secreted level normalized to cell number for  $n = 3$  replicates. \* $p < 0.05$  compared to medium by Student's  $t$  test.

No Pre-Activation

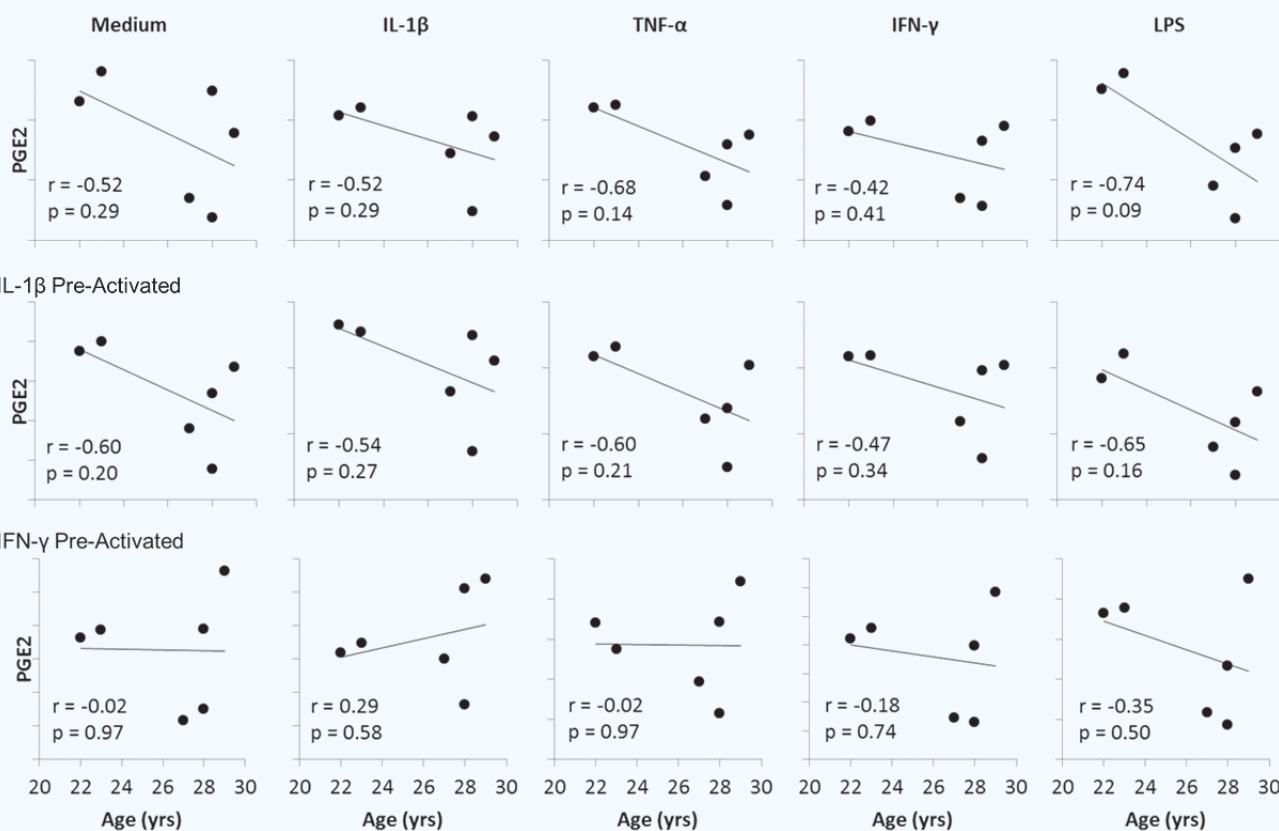

**Supplementary Figure 2** Correlation of donor age and PGE2 secretion in response to pro-inflammatory stimuli after pre-activation. PGE2 levels (black circles) were plotted against the age of the corresponding donor with a linear regression line (black line). Pearson's correlation coefficients ( $r$ ) were calculated and their statistical significances ( $p$ ) were determined using Student's  $t$  test. Each data point represents the average PGE2 secretion for a single donor.

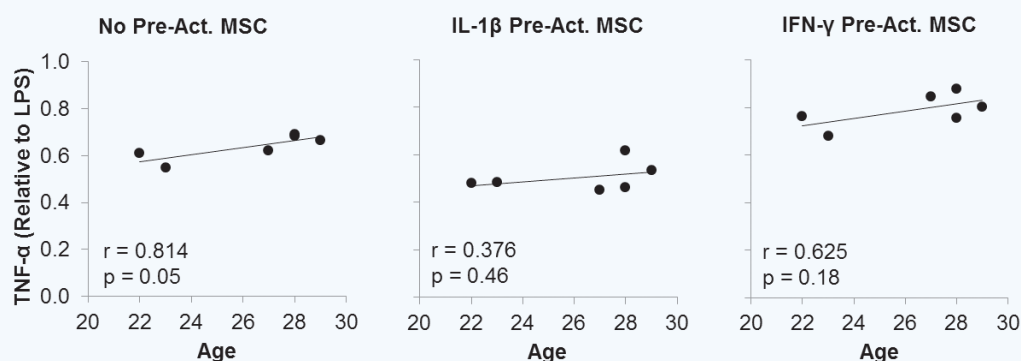

**Supplementary Figure 3** Correlation of donor age and relative TNF- $\alpha$  level in MSC/macrophage co-cultures. Relative TNF- $\alpha$  levels (black circles) were plotted against the age of the corresponding donor with a linear regression line (black line). Pearson's correlation coefficients ( $r$ ) were calculated and their statistical significances ( $p$ ) were determined using Student's  $t$  test. Each data point represents the average TNF- $\alpha$  level for a single donor.

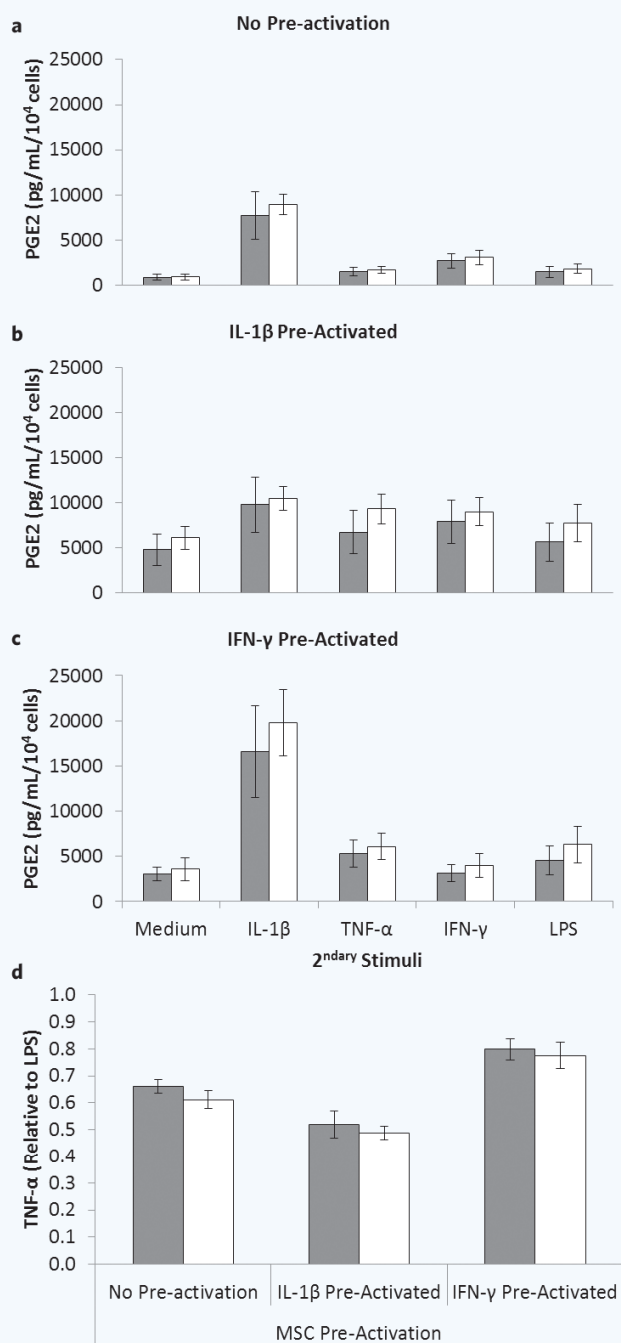

**Supplementary Figure 4** Comparison of PGE2 secretion in response to pro-inflammatory stimuli between male and female MSC donors (grey bars and white bars, respectively) after (a) no pre-activation, (b) IL-1 $\beta$  pre-activation, or (c) IFN- $\gamma$  pre-activation. (d) Comparison of relative TNF- $\alpha$  level in MSC/macrophage co-cultures between male and female MSC donors (grey bars and white bars, respectively). Data are the mean  $\pm$  SEM for PGE2 normalized to cell number or relative TNF- $\alpha$  level for equal numbers of male and female biological replicates ( $n = 3$  each).

**Supplementary Table 1** Power analysis for PGE2 secretion in response to secondary stimuli after pre-activation with IL-1 $\beta$  for 6 biological replicates (MSC donors).

| Effect                             | Mean of difference | St. dev. of difference | Effect size | Power (1- $\beta$ ) |
|------------------------------------|--------------------|------------------------|-------------|---------------------|
| TNF- $\alpha$ -induced PGE2 levels | 6471               | 2880                   | 2.247       | 0.9903              |
| IFN- $\gamma$ -induced PGE2 levels | 5615               | 2003                   | 2.803       | 0.9996              |
| LPS-induced PGE2 levels            | 5071               | 2546                   | 1.992       | 0.9695              |

**Supplementary Table 2** Power analysis for the relative TNF- $\alpha$  level in macrophage co-cultures with MSCs for 6 biological replicates (MSC donors).

| Effect                                            | Mean 1 | Mean 2 | St. dev. 1 | St. dev. 2 | Correlation | Effect size | Power (1- $\beta$ ) |
|---------------------------------------------------|--------|--------|------------|------------|-------------|-------------|---------------------|
| No pre-activation vs. IL-1 $\beta$ pre-activation | 0.636  | 0.504  | 0.054      | 0.063      | 0.435       | 2.107       | 0.9814              |

**Supplementary Table 3** Power analysis for the PGE2 level in macrophage co-cultures with MSCs for 6 biological replicates (MSC donors).

| Effect                                            | Mean of difference | St. dev. of difference | Effect size | Power (1- $\beta$ ) |
|---------------------------------------------------|--------------------|------------------------|-------------|---------------------|
| No pre-activation vs. IL-1 $\beta$ pre-activation | 38780              | 28440                  | 1.364       | 0.7606              |
